# Supplementary material for: A Novel AURKA Mutant-Induced Early-Onset Severe Hepatocarcinogenesis Greater than Wild-Type via Activating Different Pathways in Zebrafish
Source: PubMed Central journal article supplement (PMC6678475; doi:10.3390/cancers11070927), 2019-07-02
Supplement: cancers-11-00927-s001.pdf [file cancers-11-00927-s001.pdf]

## Supplementary Material

# A Novel AURKA Mutant-Induced Early-Onset Severe Hepatocarcinogenesis Greater than Wild-Type via Activating Different Pathways in Zebrafish

Zhong-Liang Su, Chien-Wei Su, Yi-Luen Huang, Wan-Yu Yang, Bonifasius Putera Sampurna, Toru Ouchi, Kuan-Lin Lee, Chen-Sheng Wu, Horng-Dar Wang and Chiou-Hwa Yuh

## A

### AURKA(WT)

ATG GACCGATCTAAAGAAAACCTGCATTTCCAGGACCTGTTAAGGCTACAGCTCCAGTTGGAGGTCCAAAACGTGTTCTCGTGACTCAG  
CAATTTCTTGTGTCAGAATCCATTACCTGTAATAAGTGGCCAGGCTCAGCGGGTCTTGTGTCCTTCAAATTTCTCCAGCGCATTCCCT  
TTGCAAGCACAAAAGCTTGTCTCCAGTCAACAAGCCGGTTCAGAATCAGAAGCAGAAGCAATTGCAGGCAACCAAGTGTACCTCATCCT  
GTCCTCCAGGCCACTGAATAACCCAAAAGAGCAAGCAGCCCTGCCATCGGCACCTGAAAATAATCCTGAGGAGGAAGTGGCATCA  
AAACAGAAAAATGAAGAATCAAAAAGAGGAGCAGTGGGCTTTGGAAGACTTTGAAATTTGGTTCGCCCTCTGGGTAAAGGAAAGTTTGGT  
AATGTTTATTTGGCAAGAGAAAAGCAAAGCAAGTTTATTCTGGCTCTTAAAGTGTATTAAAGCTCAGCTGGAGAAAGCCGGAGTG  
GAGCATCAGCTCAGAAGAGAAAGTAGAAATACAGTCCACCTTCGGCATCCTAATATTCTTAGACTGTATGGTTATTTCATATGCT  
ACCAGAGTCTACCTAATTTCTGGAATATGCACCACTTGGAAACAGTTTATAGAGAACTTCAGAAAACCTTCAAAGTTTGTAGGAGAGAGA  
ACTGCTACTTATATAACAGAATTTGGCAAAATGCCCTGTCTTACTGTCTTCAAGAGAGTTATTTCATAGAGACATTAAGCCAGAGAAAC  
TTACTTCTTGGATCAGCTGGAGAGCTTAAAATTCAGATTTTGGGTGGTCAGTACATGCTCCATCTTCCAGGAGGACCACTCTCTGT  
GGCACCTGGACTACCTGCCCTGAAATGATTGAAGGTCGGATGCATGATGAGAAGGTGGATCTCTGGAGCCTTGGAGTTCTTTGC  
TATGAATTTTGTAGTTGGGAAGCCTCCTTTTGGAGCAACACATACCAAGAGACCTTACAAAAGAATATCACGGGTTGAATTCACATTC  
CCTGACTTTTACAGAGGGAGCCAGGGACCTCATTTCAGACTGTTGAAGCATATCCAGCCAGAGGCCAATGCTCAGAGAAGTA  
CTTGAACACCCTGGATCACAGCAAATTCATCAAACCATCAAATTCGCAAAAACAAGAATCAGCTAGCAACAGTCTTAG

### AURKA(V352I)

ATG GACCGATCTAAAGAAAACCTGCATTTCCAGGACCTGTTAAGGCTACAGCTCCAGTTGGAGGTCCAAAACGTGTTCTCGTGACTCAG  
CAATTTCTTGTGTCAGAATCCATTACCTGTAATAAGTGGCCAGGCTCAGCGGGTCTTGTGTCCTTCAAATTTCTCCAGCGCATTCCCT  
TTGCAAGCACAAAAGCTTGTCTCCAGTCAACAAGCCGGTTCAGAATCAGAAGCAGAAGCAATTGCAGGCAACCAAGTGTACCTCATCCT  
GTCCTCCAGGCCACTGAATAACCCAAAAGAGCAAGCAGCCCTGCCATCGGCACCTGAAAATAATCCTGAGGAGGAAGTGGCATCA  
AAACAGAAAAATGAAGAATCAAAAAGAGGAGCAGTGGGCTTTGGAAGACTTTGAAATTTGGTTCGCCCTCTGGGTAAAGGAAAGTTTGGT  
AATGTTTATTTGGCAAGAGAAAAGCAAAGCAAGTTTATTCTGGCTCTTAAAGTGTATTAAAGCTCAGCTGGAGAAAGCCGGAGTG  
GAGCATCAGCTCAGAAGAGAAAGTAGAAATACAGTCCACCTTCGGCATCCTAATATTCTTAGACTGTATGGTTATTTCATATGCT  
ACCAGAGTCTACCTAATTTCTGGAATATGCACCACTTGGAAACAGTTTATAGAGAACTTCAGAAAACCTTCAAAGTTTGTAGGAGAGAGA  
ACTGCTACTTATATAACAGAATTTGGCAAAATGCCCTGTCTTACTGTCTTCAAGAGAGTTATTTCATAGAGACATTAAGCCAGAGAAAC  
TTACTTCTTGGATCAGCTGGAGAGCTTAAAATTCAGATTTTGGGTGGTCAGTACATGCTCCATCTTCCAGGAGGACCACTCTCTGT  
GGCACCTGGACTACCTGCCCTGAAATGATTGAAGGTCGGATGCATGATGAGAAGGTGGATCTCTGGAGCCTTGGAGTTCTTTGC  
TATGAATTTTGTAGTTGGGAAGCCTCCTTTTGGAGCAACACATACCAAGAGACCTTACAAAAGAATATCACGGGTTGAATTCACATTC  
CCTGACTTTTACAGAGGGAGCCAGGGACCTCATTTCAGACTGTTGAAGCATATCCAGCCAGAGGCCAATGCTCAGAGAAGTA  
CTTGAACACCCTGGATCACAGCAAATTCATCAAACCATCAAATTCGCAAAAACAAGAATCAGCTAGCAACAGTCTTAG

## B

### AURKA(WT)

1 MDRSKENCIS GPKVATAPVG GPKRVLVTQQ FPCQNPLPVN SGQAQRLVCP SNSSQRIPLQ  
61 AQLVSSHKP VQNQKQKQLQ ATSVPHVSR PLNNTQKSKQ PLPSAPENNP EEELASKQKN  
121 EESKRRQWAL EDFEIGRPLG KGKFGNVYLA REKQSKFILA LKVLFAQLE KAGVEHQLR  
181 EVEIQSHLRH PNILRLYGYF HDATRVYLIL EYAPLGTVYR ELQKLSKFDE QRTATYITEL  
241 ANALSYCHSK RVIHRDIKPE NLLLSAGEL KIADFGWSVH APSSRRTTLC GTLDYLPPEM  
301 IEGRMHDEKV DLWSLGVLCY EFLVGKPPFE ANTYQETYKR ISRVEFTFPD FVTEGARDLI  
361 SRLLKHNPSQ RPLREVLEH PWITANSSKP SNCQNKESAS KQS\*

### AURKA(V352I)

1 MDRSKENCIS GPKVATAPVG GPKRVLVTQQ FPCQNPLPVN SGQAQRLVCP SNSSQRIPLQ  
61 AQLVSSHKP VQNQKQKQLQ ATSVPHVSR PLNNTQKSKQ PLPSAPENNP EEELASKQKN  
121 EESKRRQWAL EDFEIGRPLG KGKFGNVYLA REKQSKFILA LKVLFAQLE KAGVEHQLR  
181 EVEIQSHLRH PNILRLYGYF HDATRVYLIL EYAPLGTVYR ELQKLSKFDE QRTATYITEL  
241 ANALSYCHSK RVIHRDIKPE NLLLSAGEL KIADFGWSVH APSSRRTTLC GLDYLPPEM  
301 IEGRMHDEKV DLWSLGVLCY EFLVGKPPFE ANTYQETYKR ISRVEFTFPD FTEGARDLI  
361 SRLLKHNPSQ RPLREVLEH PWITANSSKP SNCQNKESAS KQS\*

**Figure S1.** Sequence of AURKA (WT) and AURKA (V352I). (A) mRNA sequence of AURKA (WT) and AURKA (V352I), the red indicates the mutated nucleotide sequence. (B) Protein sequence of AURKA (WT) and AURKA (V352I), the red box indicates the mutated amino acid sequence.

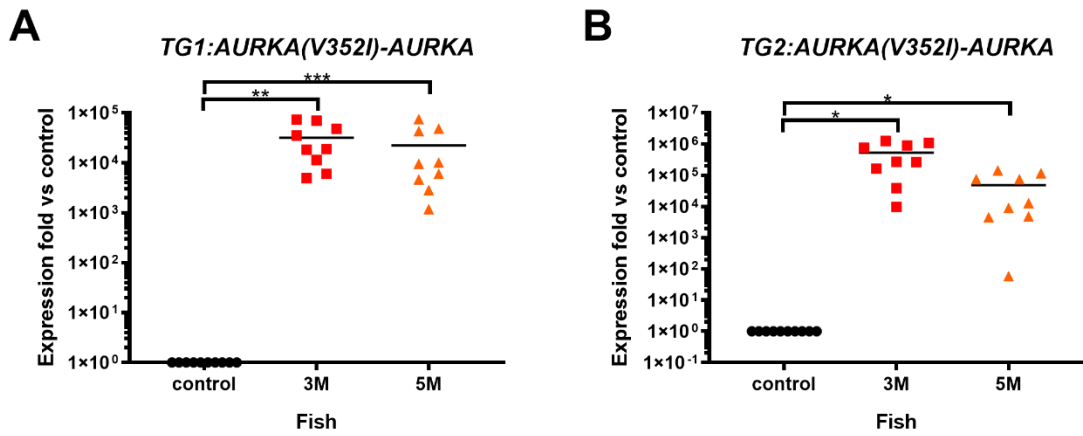

**Figure S2.** Expression of AURKA in TG1-AURKA(V352I) and TG2-AURKA(V352I) transgenic zebrafish compared with control fish. qPCR analysis of AURKA in TG1-AURKA(V352I) and TG2-AURKA(V352I) transgenic zebrafish compared to control fish at 3 M and 5 M. **(A)** TG1: Tg(fabp10a:AURKA(V352I)-EGFP-mCherry, myl7:EGFP). **(B)** TG2: Tg(fabp10a:AURKA(V352I)-EGFP-mCherry, myl7:EGFP). Expression fold compared to control fish (Tg(fabp10a:EGFP-mCherry)) was shown in red (3M) and orange (5M). Statistical analysis of results was performed using a two-tailed Student's *t*-test. Asterisks (\*) represent the level of significance. \*: *p*-value  $\leq 0.05$ ; \*\*: *p*-value  $\leq 0.01$ ; \*\*\*: *p*-value  $\leq 0.001$ .

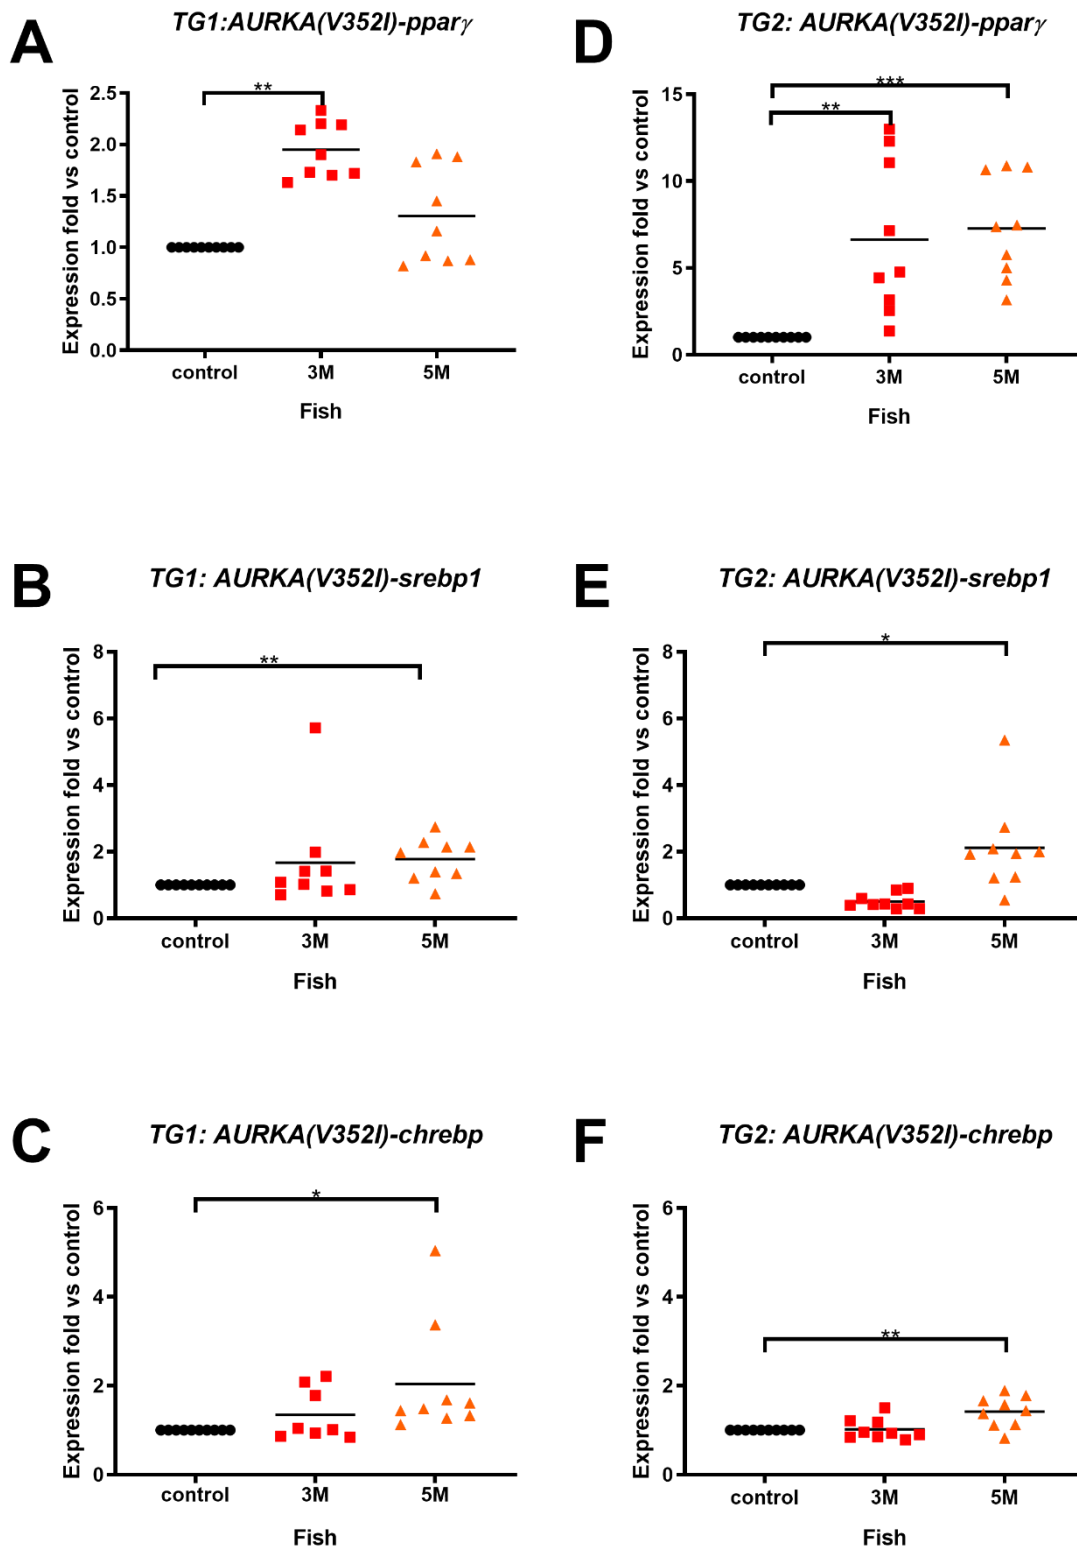

**Figure S3.** Expression of lipogenic factors (*ppar $\gamma$* , *srebp1*, *chrebp*) in TG1-AURKA(V352I) and TG2-AURKA(V352I) transgenic fish were higher than control. qPCR analysis of lipogenic factors (**A**, **D**) *ppar $\gamma$* ; (**B**, **E**) *srebp1*; (**C**, **F**) *chrebp* in TG1-AURKA(V352I) and TG2-AURKA(V352I) transgenic zebrafish compared to control fish at different time points. Statistical analysis of results was performed using a two-tailed Student's *t*-test. Asterisks (\*) represent the level of significance. \*:  $p$ -value  $\leq 0.05$ ; \*\*:  $p$ -value  $\leq 0.01$ ; \*\*\*:  $p$ -value  $\leq 0.001$ .

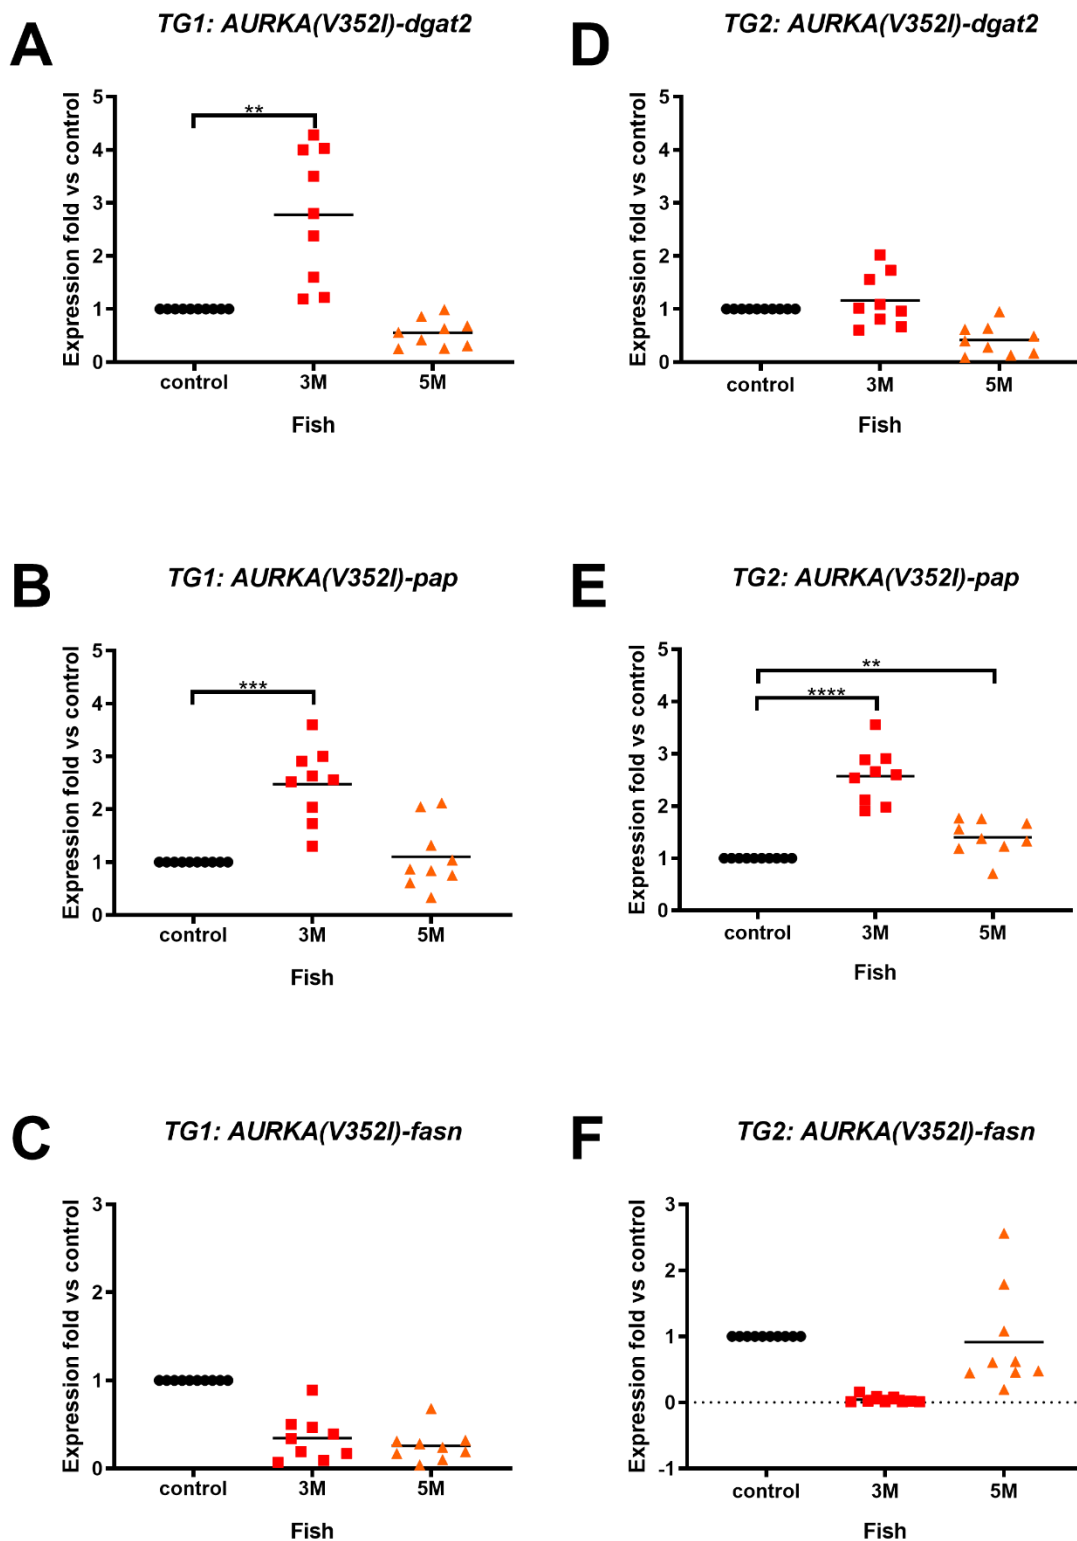

**Figure S4.** Expression of lipogenic enzymes (*dgat2*, *pap*, *fasn*) in TG1-AURKA (V352I) and TG2-AURKA (V352I) transgenic fish were higher than control. qPCR analysis of lipogenic enzyme (A, D) *dgat2*; (B, E) *pap*; (C, F) *fasn* in TG1-AURKA(V352I) and TG2-AURKA(V352I) transgenic zebrafish compared to control fish at different time points. Statistical analysis of results was performed using a two-tailed Student's *t*-test. Asterisks (\*) represent the level of significance. \*\*: *p*-value  $\leq 0.01$ ; \*\*\*: *p*-value  $\leq 0.001$ .

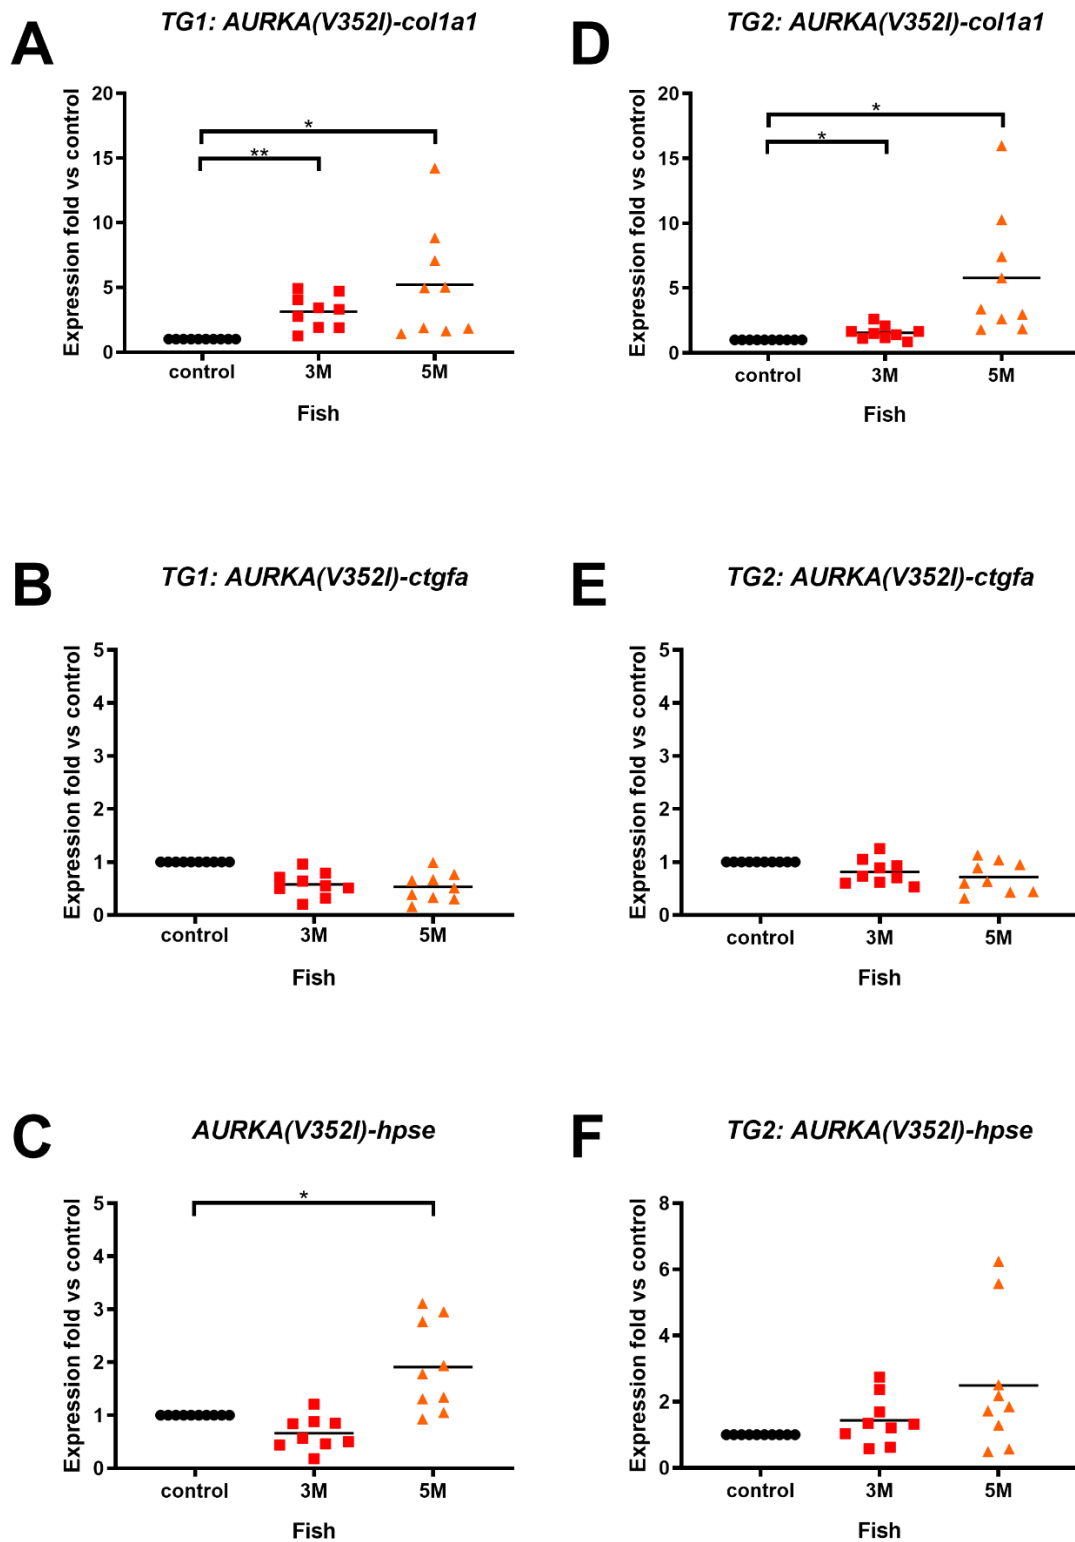

**Figure S5.** Expression of fibrosis markers (*col1a1*, *ctgfa*, *hpse*) in TG1-AURKA (V352I) and TG2-AURKA (V352I) transgenic fish compared to control. qPCR analysis of fibrosis markers (A, D) *col1a1*; (B, E) *ctgfa*; (C, F) *hpse* in TG1-AURKA(V352I) and TG2-AURKA(V352I) transgenic zebrafish compared to control fish at different time points. Statistical analysis of results was performed using a two-tailed Student's *t*-test. Asterisks (\*) represent the level of significance. \*: *p*-value ≤ 0.05; \*\*: *p*-value ≤ 0.01.

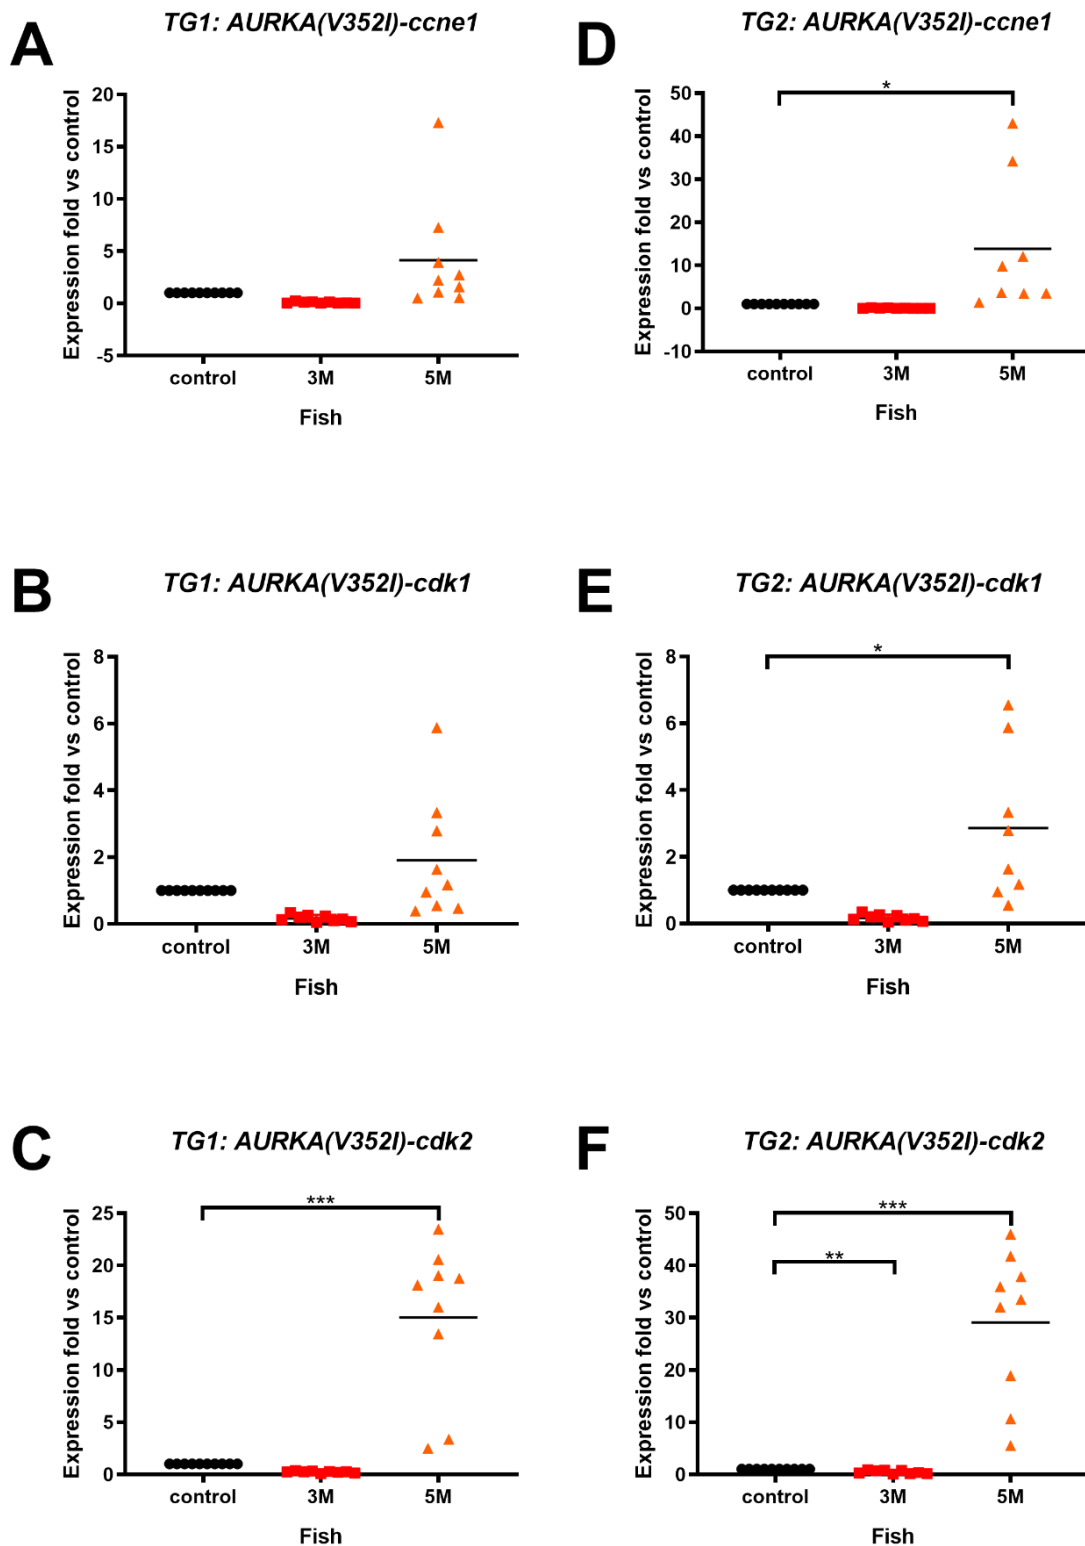

**Figure S6.** Expression of cell cycle related genes (*ccne1*, *cdk1*, *cdk2*) was higher in TG1-AURKA (V352I) and TG2-AURKA (V352I) transgenic fish. qPCR analysis of cell cycle/proliferation markers (A, D) *ccne1*; (B, E) *cdk1*; (C, F) *cdk2* in TG1-AURKA(V352I) and TG2-AURKA(V352I) transgenic zebrafish compared to control fish at different time points. Statistical analysis of results was performed using a two-tailed Student's *t*-test. Asterisks (\*) represent the level of significance. \*:  $p$ -value  $\leq 0.05$ ; \*\*:  $p$ -value  $\leq 0.01$ ; \*\*\*:  $p$ -value  $\leq 0.001$ .

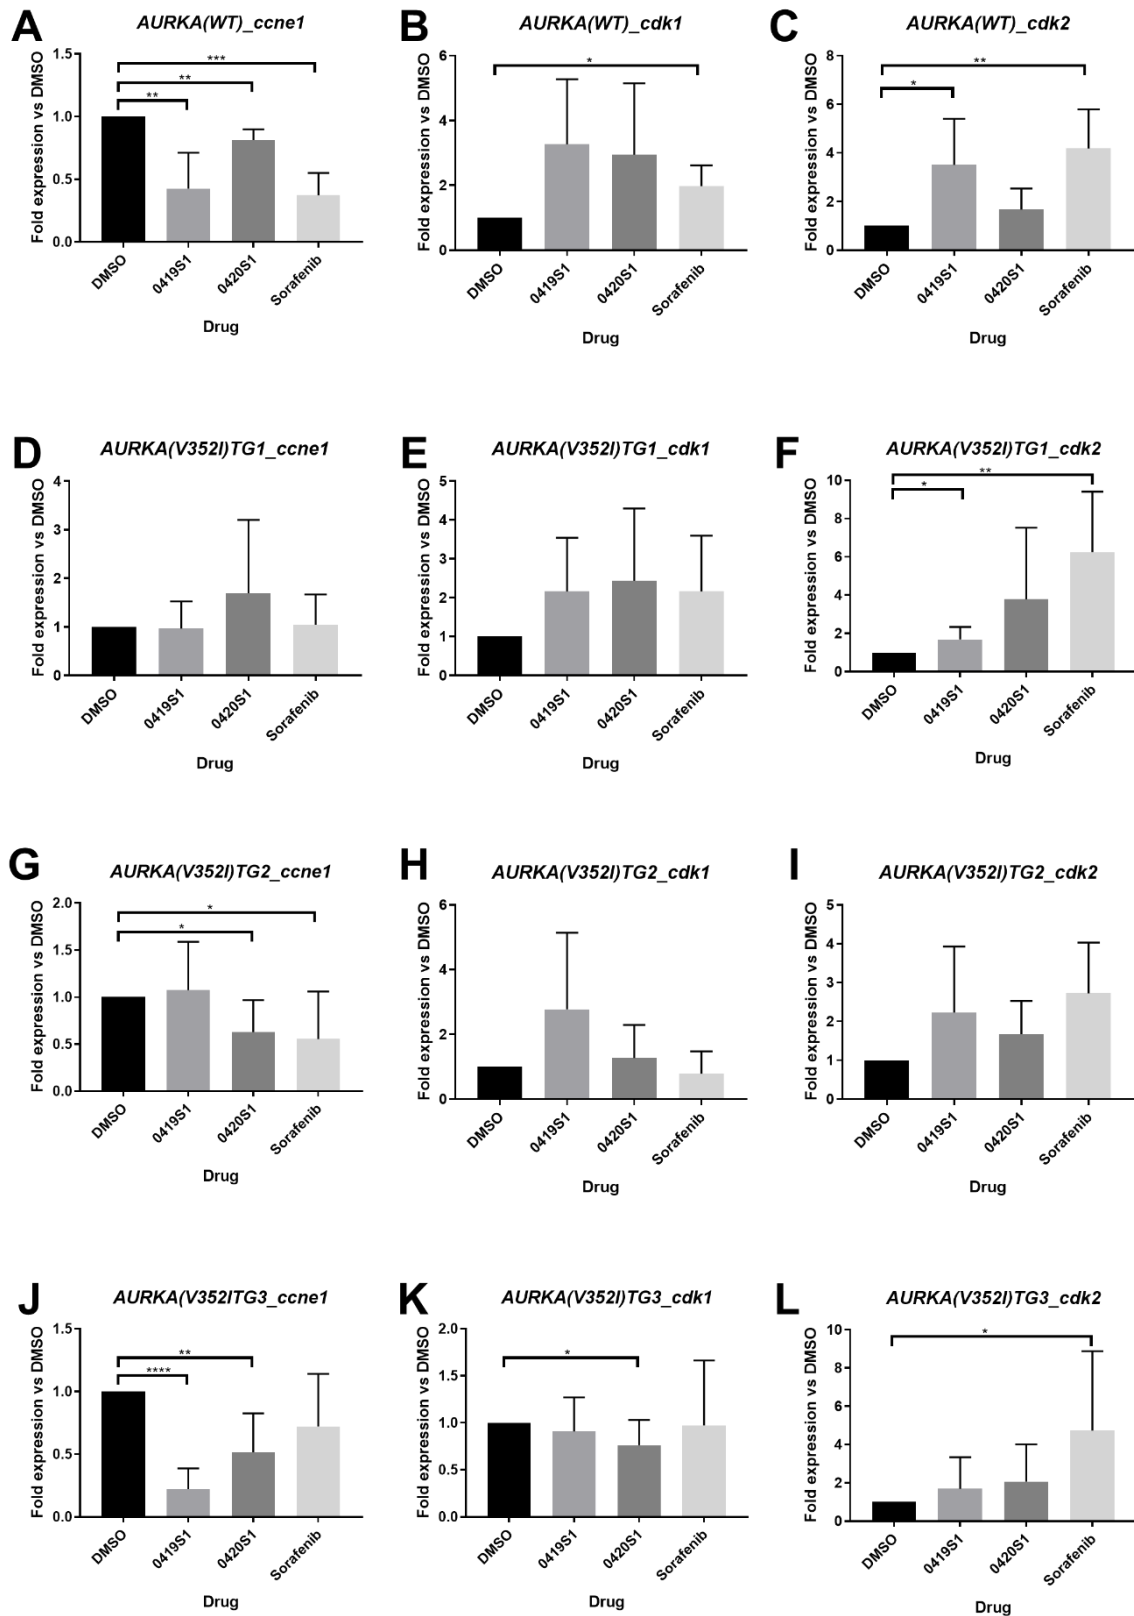

**Figure S7.** Expression of cell cycle related genes (*ccne1*, *cdk1*, *cdk2*) in AURKA(WT), TG1-AURKA(V352I), TG2-AURKA(V352I), and TG3-AURKA(V352I) transgenic fish after oral feeding of 0419S1, 0420S1 and Sorafenib for one month. qPCR analysis of cell cycle/proliferation markers (**A**, **D**, **G**, **J**) *ccne1*; (**B**, **E**, **H**, **K**) *cdk1*; (**C**, **F**, **I**, **L**) *cdk2* in AURKA (WT), TG1-AURKA(V352I), TG2-AURKA(V352I), and TG3-AURKA (V352I) transgenic zebrafish compared to control fish at different time points. Statistical analysis of results was performed using a two-tailed Student's *t*-test. Asterisks

(\*) represent the level of significance. \*:  $p$ -value  $\leq 0.05$ ; \*\*:  $p$ -value  $\leq 0.01$ ; \*\*\*:  $p$ -value  $\leq 0.001$ ; \*\*\*\*:  $p$ -value  $\leq 0.0001$ .
